# Supplementary material
Source: Royal Society of Chemistry journal article supplement (https://www.rsc.org/suppdata/dt/1999/4269/907740e.doc)
Supplement: Supplementary file 1 [file 907740e.doc]

**Table**  Structural and Magnetic Parameters for dinuclear doubly *N*1-*N*2 1,2,4-triazole bridged nickel(II) compounds.

Compound*1* Ni-N-N() Ni-N'-N'() N-Ni-N'() J(cm-1) Ref

[Ni2(abpt)2Cl2(H2O)2]Cl2.4H2O 132.63(8) 134.22(8) 93.00(4) -12.5(2) 46

[Ni2(Hpt)2(H2O)6](NO3)4 138.8(1) 124.3(1) 96.87(7) -4.65(5) 45

[Ni(daat)(NO3)(H2O)]2*2* ca.128.0 ca.129.2 ca.102.8 -5.51(5) this work

1 abpt = 4-amino-3,5-bis(pyridin-2-yl)-1,2,4-triazole;

Hpt =3-(pyridin-2-yl)-1,2,4-triazole;

*2* structural data for this compound belong to the structure of the Cu(II) compound **1**; they have been included in this table considering that the Cu(II) and Ni(II) compounds are isostructural.
